# Supplementary material
Source: MDPI journal article supplement (https://www.mdpi.com/2072-4292/12/18/2920)
Supplement: s1 [file s1]

# Supplementary Material

## The global wind resource observed by scatterometer

**Ian R. Young <sup>1,\*</sup>, Ebru Kirezci <sup>1</sup> and Agustinus Ribal <sup>1,2</sup>**

<sup>1</sup> Department of Infrastructure Engineering, The University of Melbourne, Vic 3010, Australia

<sup>2</sup> Department of Mathematics, Faculty of Mathematics and Natural Sciences, Hasanuddin University, Makassar, Indonesia

Contains Supplementary figures S1 – S7

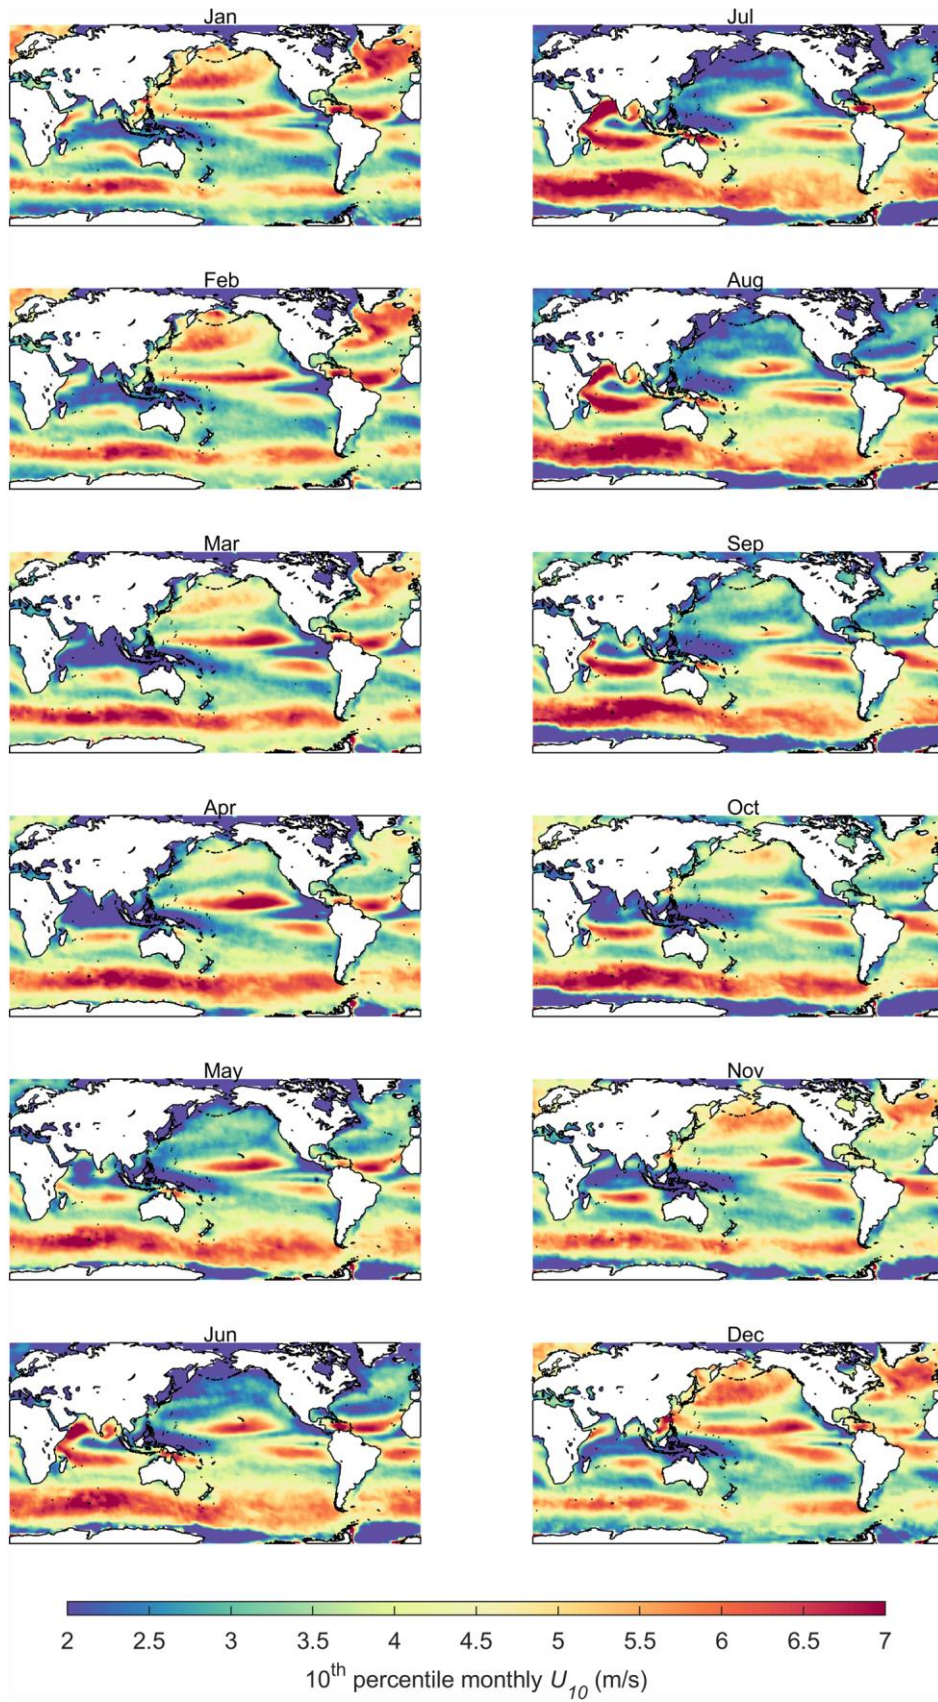

**Figure S1:** The 10<sup>th</sup> percentile global monthly wind speed from scatterometer data,  $U_{10}(10)$ . The data were gridded at  $2^\circ$  resolution.

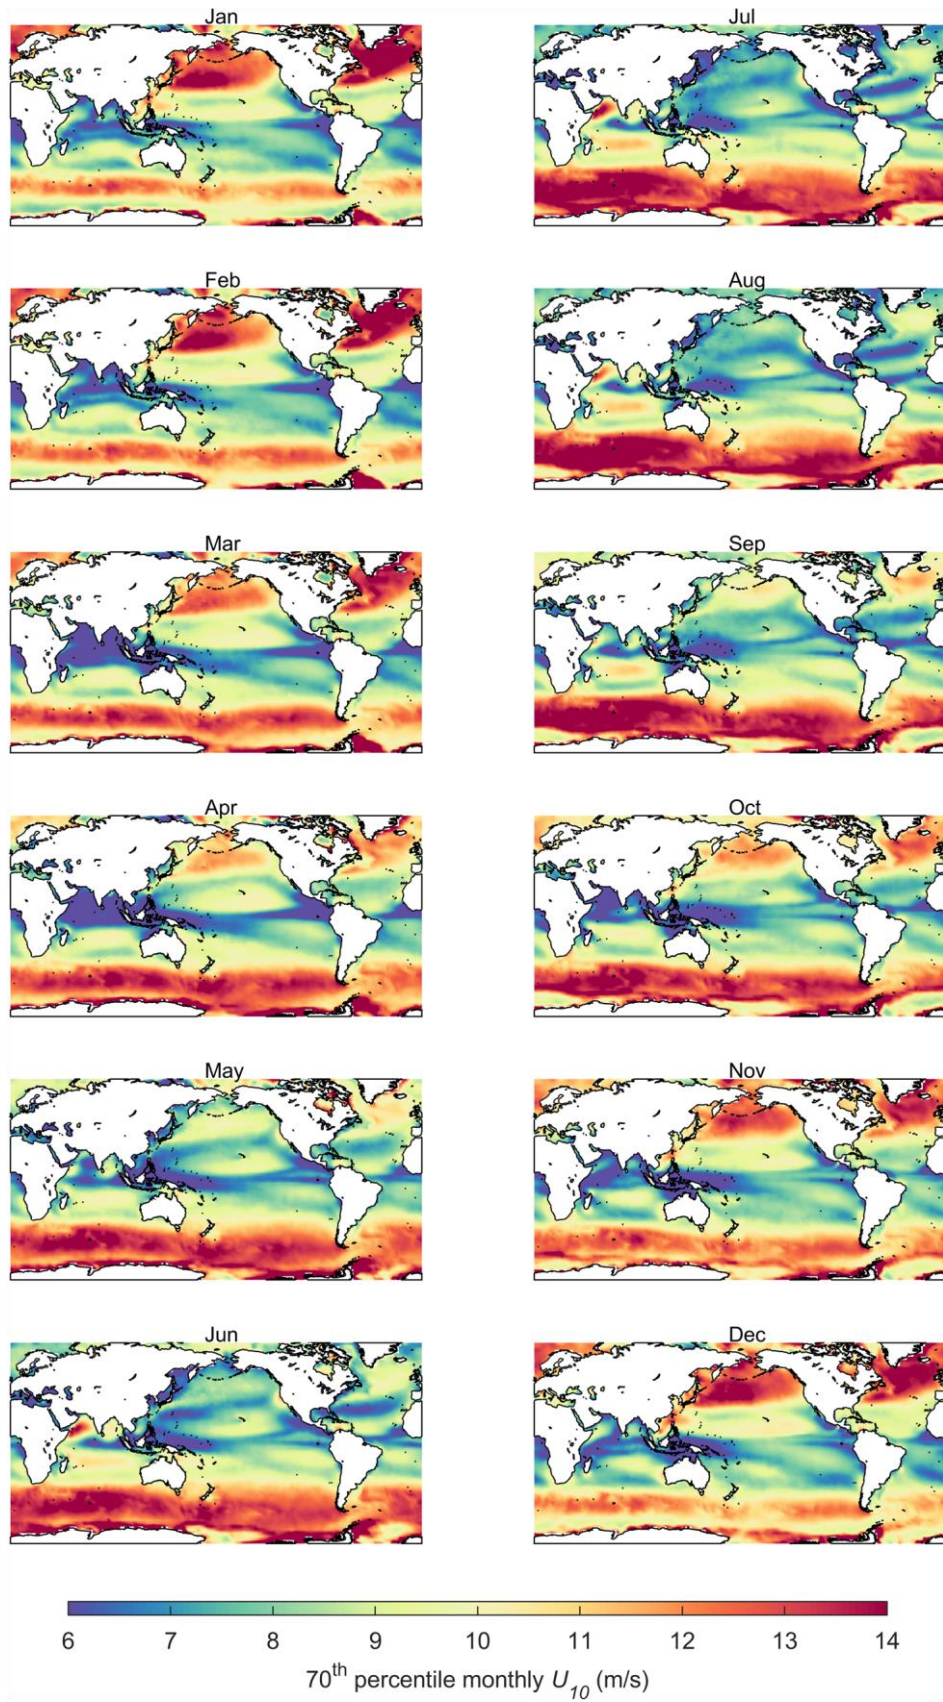

**Figure S2:** The 70<sup>th</sup> percentile global monthly wind speed from scatterometer data,  $U_{10}(70)$ . The data were gridded at  $2^\circ$  resolution.



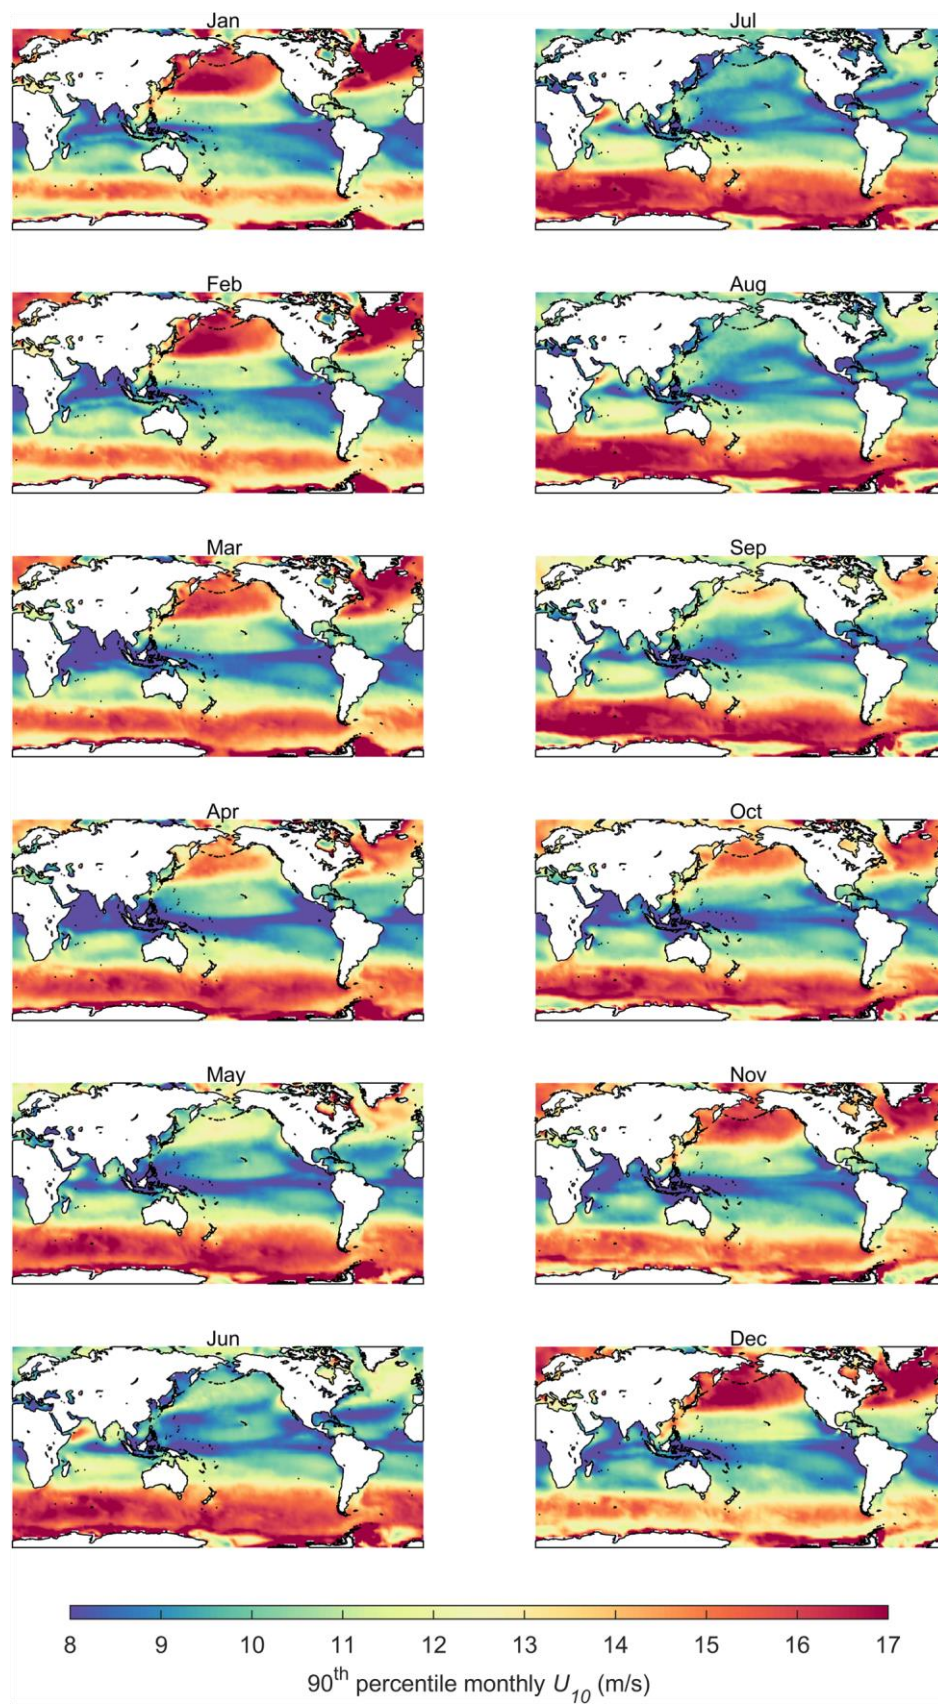

**Figure S3:** The 90<sup>th</sup> percentile global monthly wind speed from scatterometer data,  $U_{10}(90)$ . The data were gridded at  $2^\circ$  resolution.

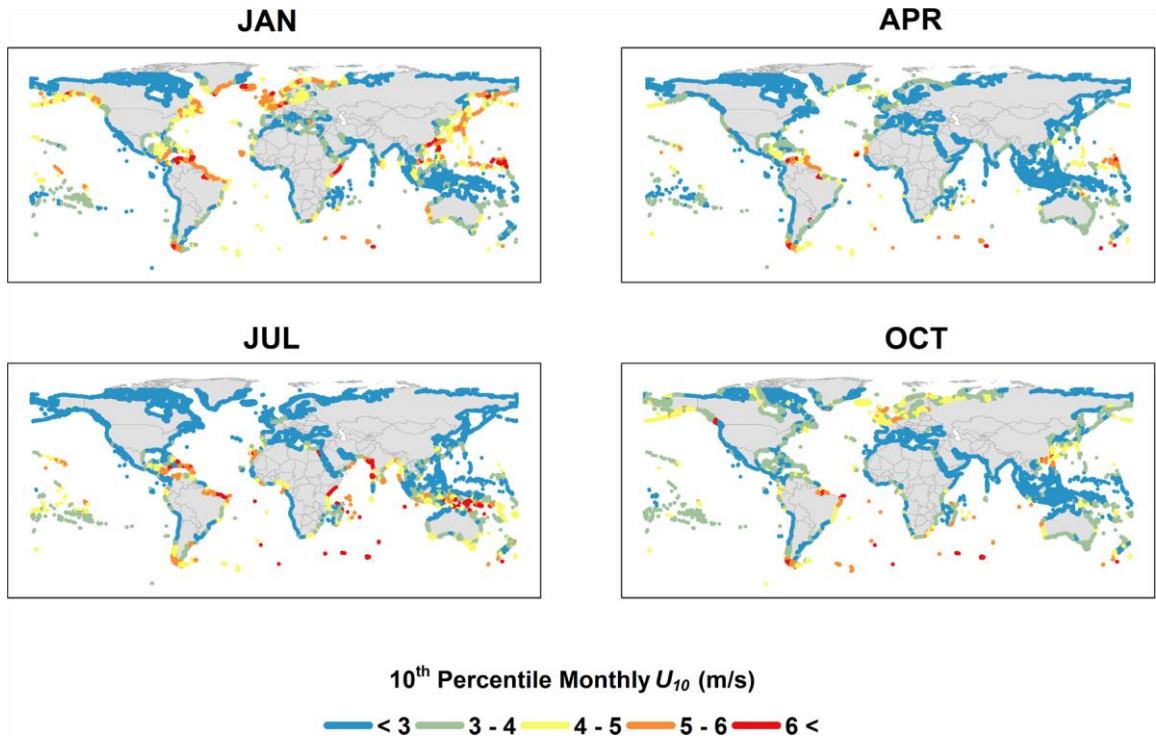

**Figure S4:** The 10<sup>th</sup> percentile monthly wind speed,  $U_{10}(10)$  at near-coastal locations defined by the DIVA dataset.

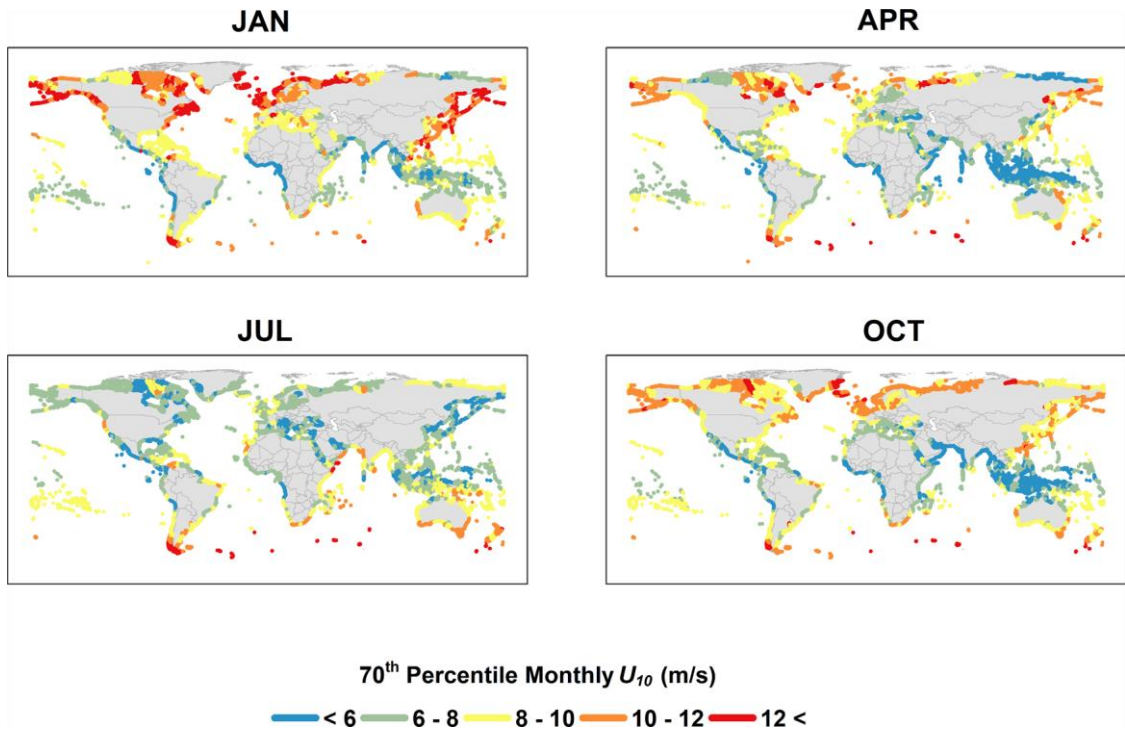

**Figure S5:** The 70<sup>th</sup> percentile monthly wind speed,  $U_{10}(70)$  at near-coastal locations defined by the DIVA dataset.



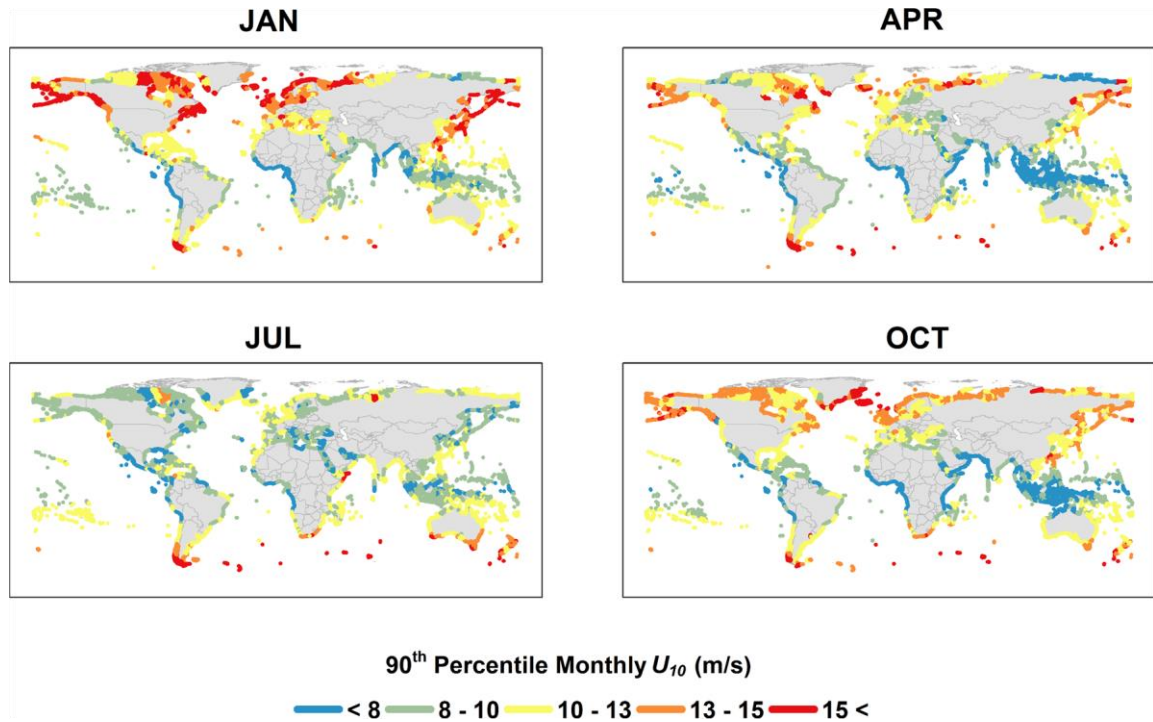

**Figure S6:** The 90<sup>th</sup> percentile monthly wind speed,  $U_{10}(90)$  at near-coastal locations defined by the DIVA dataset.

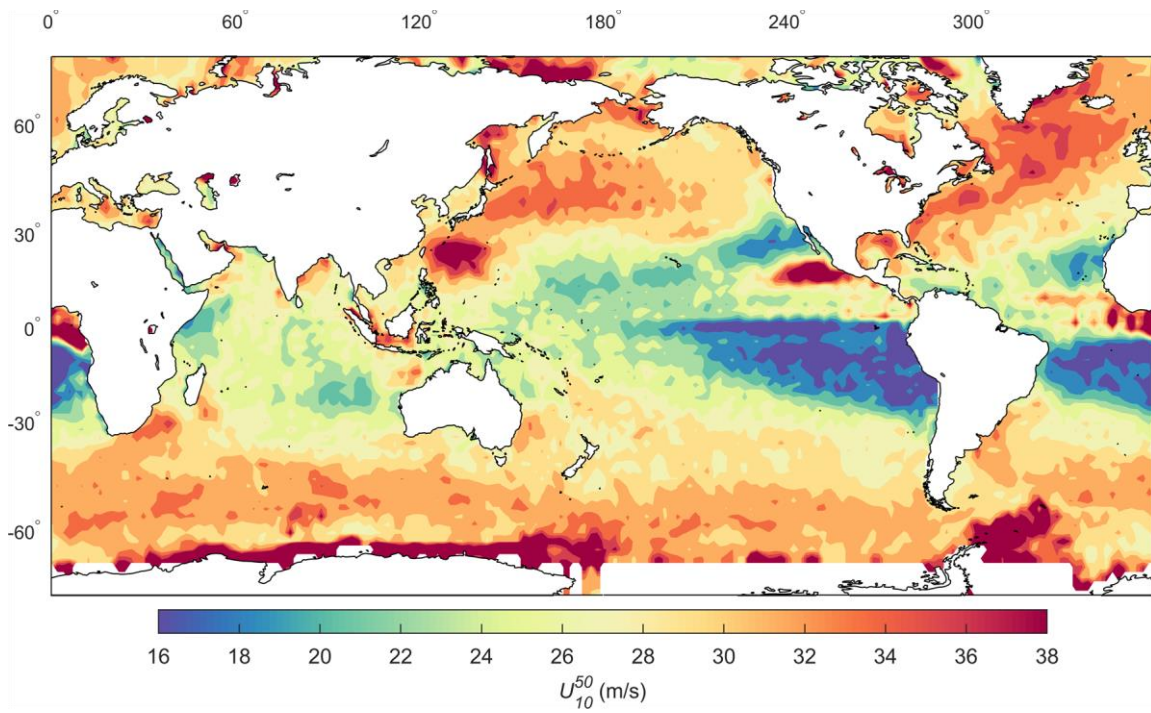

**Figure S7:** The 50-year return period wind speed,  $U_{10}^{50}$  obtained with a PoT analysis and a GPD distribution. Data gridded at  $2^\circ$  resolution.
